# Supplementary material for: A glucose-assisted redox hydrothermal route to prepare a Mn-doped CeO2catalyst for the total catalytic oxidation of VOCs
Source: Royal Society of Chemistry journal article supplement (doi:10.1039/d3ra00957b), 2023-01-01
Supplement: d3ra00957b1.pdf [file d3ra00957b1.pdf]

## **Glucose-assisted redox hydrothermal route to prepare Mn-Doped**

### **CeO<sub>2</sub> Catalyst for the Total Catalytic Oxidation of VOCs**

Nga Hang Thi Phan<sup>1</sup>, Chinh Chien Nguyen<sup>2,3</sup>, Minh Tuan Nguyen Dinh\*<sup>4</sup>

<sup>1</sup> *The University of Danang, School of Medicine and Pharmacy, Danang 550000, Vietnam*

<sup>2</sup> *Institute of Research and Development, Duy Tan University, Danang city 550000, Vietnam.*

<sup>3</sup> *Faculty of Environmental and Chemical Engineering, Duy Tan University, Da Nang 550000, Vietnam*

<sup>4</sup> *The University of Danang, University of Science and Technology, 54, Nguyen Luong Bang, Danang city, Viet Nam*

\* *Corresponding author: ndmtuan@dut.udn.vn*

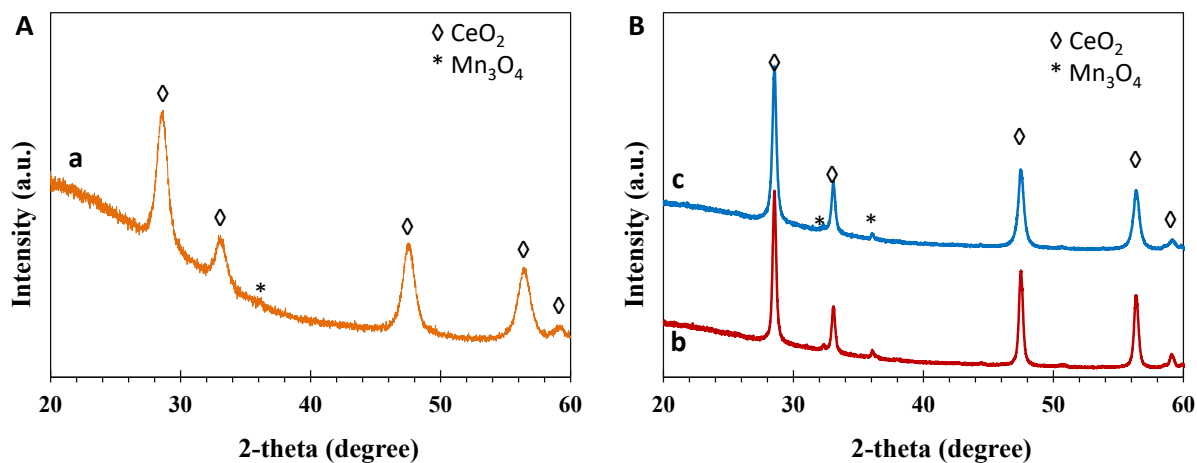

Figure S1: XRD pattern of A) Mn-CeO<sub>2</sub>-R catalysts after TGA analysis at 700 °C in nitrogen; B) b) Mn-CeO<sub>2</sub>-C and c) Mn-CeO<sub>2</sub>-R obtained after TGA analysis at 900 °C in nitrogen atmosphere.

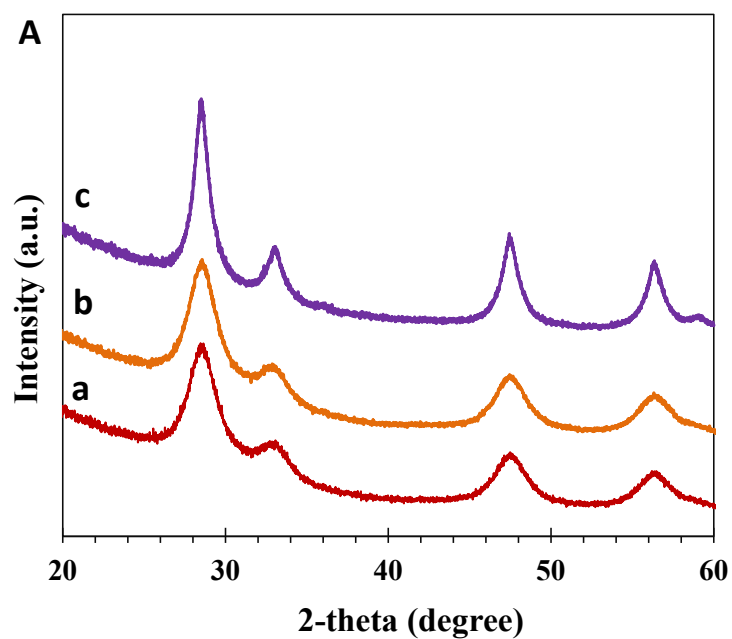

Figure S2. XRD pattern of Mn-CeO<sub>2</sub>-R sample a) fresh, b) after HCHO test, and c) after toluene test.
